# Supplementary material
Source: PubMed Central journal article supplement (PMC7416209)
Supplement: 10-1055-a-1193-5475-s.pdf [file 10-1055-a-1193-5475-s.pdf]

Interessenkonflikterklärungen zum Addendum zu den S3-Leitlinien Morbus Crohn und Colitis ulcerosa: Betreuung von Patienten mit chronisch-entzündlichen Darmerkrankungen in der COVID-19 Pandemie – offene Fragen und Antworten – Stand 19. Mai 2020

|              | Berater-/Gutachter-tätigkeit                  | Mitarbeit in einem Wissenschaftlichen Beirat (advisory board) | Bezahlte Vortrags- oder Schulungs-tätigkeit                                                                       | Bezahlte Autoren- oder Coautorenschaft | Forschungs-vorhaben/ Durchführung klinischer Studien | Eigentümer-interessen (Patent, Urheberrecht, Aktienbesitz) | Indirekte Interessen                                                                                                                                                                                                                                                                                                                                                                                                                                                                                    |
|--------------|-----------------------------------------------|---------------------------------------------------------------|-------------------------------------------------------------------------------------------------------------------|----------------------------------------|------------------------------------------------------|------------------------------------------------------------|---------------------------------------------------------------------------------------------------------------------------------------------------------------------------------------------------------------------------------------------------------------------------------------------------------------------------------------------------------------------------------------------------------------------------------------------------------------------------------------------------------|
| Aden, Konrad | -                                             | Takeda                                                        | Janssen                                                                                                           | -                                      | Pfizer                                               | -                                                          | Mitglied: Mitglied der DGVS, sowie des Kompetenznetz Darmerkrankungen<br>Schwerpunkt: Präzisionsmedizin bei chronisch entzündlichen Darmerkrankungen<br>Federführung: keine<br>Persönlich: keine                                                                                                                                                                                                                                                                                                        |
| Andus, Tilo  | Dr. Falk Pharma                               | Amgen                                                         | Dr. Falk Pharma                                                                                                   | -                                      | -                                                    | -                                                          | Mitglied: DCCV<br>Schwerpunkt: -<br>Federführung: -<br>Persönlich: -                                                                                                                                                                                                                                                                                                                                                                                                                                    |
| Atreya, Raja | Boehringer-Ingelheim<br>InDex Pharmaceuticals | AbbVie<br>Biogen<br>Janssen-Cilag                             | AbbVie<br>Biogen<br>Dr. Falk Pharma<br>Ferring<br>Janssen-Cilag<br>MSD<br>Pfizer<br>Roche Pharma<br>Takeda Pharma | -                                      | Biogen<br>InDex Pharmaceuticals<br>Takeda Pharma     | -                                                          | Mitglied: Sprecher Beirat Grundlagenforschung, Deutsche Morbus Crohn/Colitis ulcerosa Vereinigung e. V. (DCCV)<br>Mitglied: Vertreter für Deutschland (National Representative) in der European Crohn's and Colitis Organization<br>Mitglied: Vorstandsmitglied Kompetenznetz Darmerkrankungen<br>Mitglied: Mitglied Expertenbeirat Stiftung Lebens-Blicke<br>Mitglied: Board GISG<br>Schwerpunkt: -<br>Federführung: Arzt-Patienten-Seminar CED des Universitätsklinikums Erlangen<br>Persönlich: nein |

|                      | Berater-/Gutachter-tätigkeit | Mitarbeit in einem Wissenschaftlichen Beirat (advisory board)  | Bezahlte Vortrags- oder Schulungs-tätigkeit                                                                                                                    | Bezahlte Autoren- oder Coautoren-schaft | Forschungs-vorhaben/ Durchführung klinischer Studien | Eigentümer-interessen (Patent, Urheberrecht, Aktienbesitz) | Indirekte Interessen                                                                                                                                                                                                                                                                                                                                                                                                                                                                                                                                                                                                                                                                                                                                                                                                        |
|----------------------|------------------------------|----------------------------------------------------------------|----------------------------------------------------------------------------------------------------------------------------------------------------------------|-----------------------------------------|------------------------------------------------------|------------------------------------------------------------|-----------------------------------------------------------------------------------------------------------------------------------------------------------------------------------------------------------------------------------------------------------------------------------------------------------------------------------------------------------------------------------------------------------------------------------------------------------------------------------------------------------------------------------------------------------------------------------------------------------------------------------------------------------------------------------------------------------------------------------------------------------------------------------------------------------------------------|
| Autschbach, Frank    | -                            | -                                                              | -                                                                                                                                                              | -                                       | -                                                    | -                                                          | Mitglied: Mandatsträger der Deutschen Gesellschaft für Pathologie für die Mitarbeit in der Leitlinie Colitis ulcerosa<br>Schwerpunkt: -<br>Federführung: -<br>Persönlich: -                                                                                                                                                                                                                                                                                                                                                                                                                                                                                                                                                                                                                                                 |
| Bachmann, Oliver     | -                            | Takeda<br>Janssen<br>Pfizer<br>MSD<br>AbbVie<br>Hexal<br>Amgen | CED Service GmbH<br>Takeda<br>Ferring<br>Pfizer<br>Shield<br>MSD<br>Novartis<br>DGVS<br>update<br>AbbVie<br>Falk<br>DGAKI<br>Klinikum Kassel<br>Verein GHE/MHH | Janssen                                 | -                                                    | -                                                          | Mitglied: Arbeitsgemeinschaft Chronisch Entzündliche Darmerkrankungen (DACED, Sprecher 2013), Deutsche Gesellschaft für Innere Medizin (DGIM, Kongresssekretär 2014), Deutsche Gesellschaft für Verdauungs- und Stoffwechselerkrankungen (DGVS), Deutscher Hochschulverband European Crohn's & Colitis Organisation (ECCO), German IBD Study Group (GISG, Board-Mitglied seit 2014), Norddeutsche Arbeitsgemeinschaft für Koloproktologie Norddeutsche Gesellschaft für Gastroenterologie (NDGG), Verband leitender Klinikärzte (VLK), Verein CED Nord (Gründungsmitglied, Vizepräsident 2014-2015), Verein Kompetenznetz Darmerkrankungen (KN-CED), Verein zur Förderung der Fort- und Weiterbildung in der GHE<br>Schwerpunkt: Chronisch-entzündliche und infektiöse Darmerkrankungen<br>Federführung: -<br>Persönlich: - |
| Bettenworth, Dominik | keine                        | Takeda<br>AbbVie<br>Amgen<br>Janssen                           | Falk Foundation<br>AbbVie<br>MSD<br>Pfizer<br>Pharmacosmos<br>Vifer<br>Vifer<br>Tillotts<br>Janssen                                                            | -                                       | -                                                    | keine                                                      | Mitglied: Vorsitzender der Deutschen Arbeitsgemeinschaft für CED<br>Mitglied: Mitglied und Vorsitzender des Nachwuchs-Kommittes der Europäischen Crohn & Colitis Organisation<br>Mitglied: Nationaler Repräsentant für Deutschland bei der Europäischen Crohn & Colitis Organisation<br>Mitglied: Gutachter für Kongressabstracts und Forschungsanträge, Europäische Crohn & Colitis Organisation<br>Mitglied: Gutachter für Kongressabstract der DGVS<br>Schwerpunkt: Diagnostik und Therapie von intestinaler Entzündung, intestinaler Fibrose sowie Patienten mit Chronisch entzündlichen Darmerkrankungen<br>Federführung: keine<br>Persönlich: keine                                                                                                                                                                   |

|                     | Berater-/Gutachter-tätigkeit                                                            | Mitarbeit in einem Wissenschaftlichen Beirat (advisory board)                                                                                 | Bezahlte Vortrags- oder Schulungstätigkeit                                                                                                   | Bezahlte Autoren- oder Coautoren-schaft            | Forschungs-vorhaben/ Durchführung klinischer Studien               | Eigentümer-interessen (Patent, Urheberrecht, Aktienbesitz) | Indirekte Interessen                                                                                                                                                                                                                                                                                                                  |
|---------------------|-----------------------------------------------------------------------------------------|-----------------------------------------------------------------------------------------------------------------------------------------------|----------------------------------------------------------------------------------------------------------------------------------------------|----------------------------------------------------|--------------------------------------------------------------------|------------------------------------------------------------|---------------------------------------------------------------------------------------------------------------------------------------------------------------------------------------------------------------------------------------------------------------------------------------------------------------------------------------|
| Blumenstein, Irina  | -                                                                                       | -                                                                                                                                             | DGVS                                                                                                                                         | -                                                  | -                                                                  | keine                                                      | Mitglied: keine<br>Schwerpunkt: keine<br>Federführung: keine<br>Persönlich: keine                                                                                                                                                                                                                                                     |
| Bokemeyer, Bernd    | -                                                                                       | AbbVie<br>MSD<br>Shire<br>Ferring<br>Hospira<br>Takeda<br>Pfizer<br>Janssen<br>Boehringer<br>Amgen                                            | AbbVie<br>Ferring<br>MSD<br>Merckle<br>Falk<br>Shield Therapeutics<br>Pfizer<br>Celltrion<br>Takeda<br>Janssen<br>Amgen                      | -                                                  | AbbVie<br>Ferring<br>Givern Imaging<br>Janssen<br>Takeda<br>Pfizer | -                                                          | Mitglied: -<br>Schwerpunkt: -<br>Federführung: -<br>Persönlich: -                                                                                                                                                                                                                                                                     |
| Brechmann, Thorsten | keine                                                                                   | keine                                                                                                                                         | AbbVie, Takeda, Kompetenznetz CED                                                                                                            | keine                                              | Roche                                                              | keine                                                      | Mitglied: DGVS, Kommission für Gesundheitsökonomie und medizinische Klassifikation, Ethikkommission der RUB, Kompetenznetz CED, DCCV<br>Schwerpunkt: Chronisch-entzündliche Darmerkrankungen, Endoskopie, bildgebende Verfahren, Funktionsdiagnostik<br>Federführung: CED-Symposium Rhein-Ruhr, Gastroseminar<br>Persönlich: keine    |
| Bufler, Philip      | DFG verschiedene wissenschaftliche Zeitschriften                                        | Promethera<br>GMP Orphan                                                                                                                      | AbbVie<br>Nutricia<br>Kompetenznetz<br>CED                                                                                                   | Verschiedene Autor/Coautoren-schaftlicher Beiträge | Beteiligung an verschiedenen klinischen Studien<br>PIBD-NET        | keine                                                      | Mitglied: keine<br>Schwerpunkt: Immunologie, Chronisch-entzündliche Darmerkrankungen, Pädiatrische Gastroenterologie, Experimentelle Hepatologie<br>Federführung: Regelmäßige Fortbildungsveranstaltung für Berliner Kinderärzte und Kinder gastroenterologen<br>Persönlich: keine                                                    |
| Böcker, Ulrich      | Schlichtungsstelle für Arzthaf-pflichtfragen<br>Hans-Bäckler-Allee 3,<br>30173 Hannover | Janssen-Cilag<br>GmbH Johnson & Johnson Platz 1,<br>41470 Neuss<br>Takeda Pharma<br>Vertrieb GmbH & Co. KG<br>jägerstraße 27,<br>10117 Berlin | Takeda Pharma<br>Vertrieb GmbH & Co. KG<br>jägerstraße 27,<br>10117 Berlin<br>Nutricia GmbH<br>Allee am Röthelheimpark 11,<br>91052 Erlangen | -                                                  | -                                                                  | -                                                          | Mitglied: Gastro Liga e. V. Friedrich-List-Str. 13, 35398 Gießen; Beiratsmitglied<br>Mitglied: DCCV e. V., Reinhardtstr. 18, 10117 Berlin; Mitglied<br>Mitglied: Verband der leitenden Krankenhaus Ärzte Deutschlands, Haus der Ärzteschaft<br>Tersteegenstr. 9, 40474 Düsseldorf; Stv. Vorsitzender Landesverband Berlin-Brandenburg |

|                | Berater-/Gutachter-tätigkeit                                                            | Mitarbeit in einem Wissenschaftlichen Beirat (advisory board)                                | Bezahlte Vortrags- oder Schulungs-tätigkeit                                                                                                                                                                     | Bezahlte Autoren- oder Coautoren-schaft | Forschungs-vorhaben/ Durchführung klinischer Studien | Eigentümer-interessen (Patent, Urheberrecht, Aktienbesitz) | Indirekte Interessen                                                                                                                                                                                                                                                                                                                                                                                                                                                                                                                                                                                                                                                                                                                                                                                                                                                                                                                                                                                                                                                                                                                                                         |
|----------------|-----------------------------------------------------------------------------------------|----------------------------------------------------------------------------------------------|-----------------------------------------------------------------------------------------------------------------------------------------------------------------------------------------------------------------|-----------------------------------------|------------------------------------------------------|------------------------------------------------------------|------------------------------------------------------------------------------------------------------------------------------------------------------------------------------------------------------------------------------------------------------------------------------------------------------------------------------------------------------------------------------------------------------------------------------------------------------------------------------------------------------------------------------------------------------------------------------------------------------------------------------------------------------------------------------------------------------------------------------------------------------------------------------------------------------------------------------------------------------------------------------------------------------------------------------------------------------------------------------------------------------------------------------------------------------------------------------------------------------------------------------------------------------------------------------|
| Büning, Jürgen | -                                                                                       | Takeda<br>Janssen                                                                            | Ärztekammer, Berlin<br>Shire Friedrich-strasse 149,<br>10117 Berlin<br>AbbVie Deutsch-land GmbH & CO KG<br>Mainzer Straße 81,<br>65189 Wiesbaden<br>Falk Foundation<br>Leinenweber-strasse 5, 79108<br>Freiburg | -                                       | AbbVie                                               | -                                                          | Mitglied: Kompetenznetz Darmerkrankungen, Hopfenstr. 60, 24103 Kiel; Mitglied<br>Mitglied: Weitere Mitgliedschaften: Ärztekammer, AGA, Deutsche Gesellschaft für Innere Medizin (DGIM), Deutsche Gesellschaft f. Verdauungs- u. Stoffwechselerkrankungen und Berufsverband, Deutsche Krebsgesellschaft, Südwestdeutsche Gesell-schaft für Innere Medizin, Deutsche Leberstiftung, Arbeitsgemeinschaft Leitender Gastroenterologi-scher Krankenhausärzte (ALGK) e. V., Verein gastroenterologisch tätiger Internisten Berlin<br>Schwerpunkt: Chronisch entzündliche Darm-erkrankungen<br>Federführung: Interne und externe Fortbildungen in der Funktion des Chefarztes der Klinik für Gastroenterologie, Diabetologie und Hepatologie, Vivantes Klinikum Neukölln, u. a. Crohn-Colitis-Tag, Klinische Hepatologie in Neukölln<br>Persönlich: -<br>Mitglied: DGVS<br>Mitglied: Kompetenznetz Darmerkrankungen<br>Mitglied: ECCO<br>Schwerpunkt: Publikationen zur Therapie und Pathophysiologie von CED<br>Federführung: Fallkonferenzen zu CED in Lübeck, monatlich<br>Federführung: Forum Gastroenterologie Lübeck, jährlich<br>Federführung: CED regional<br>Persönlich: - |
| Dignaß, Axel   | Janssen<br>Tillotts<br>AbbVie<br>Roche<br>Amgen<br>Fresenius Kabi<br>Pfizer<br>Dr. Falk | MSD<br>AbbVie<br>Takeda<br>Celgene<br>Roche<br>Pfizer<br>Fresenius Kabi<br>Amgen<br>Tillotts | Falk<br>Pfizer<br>Takeda<br>Janssen<br>AbbVie<br>Tillotts                                                                                                                                                       | -                                       | Pfizer, AbbVie, Janssen, Gilead Celgene, Alfasigma   | -                                                          | Mitglied: DGVS, ECCO, Kompetenznetz Darmerkrankungen, DGIM, AGA<br>Schwerpunkt: -<br>Federführung: -<br>Persönlich: -                                                                                                                                                                                                                                                                                                                                                                                                                                                                                                                                                                                                                                                                                                                                                                                                                                                                                                                                                                                                                                                        |

|                 | Berater-/Gutachter-tätigkeit                 | Mitarbeit in einem Wissenschaftlichen Beirat (advisory board) | Bezahlte Vortrags- oder Schulungs-tätigkeit                                                                                                                                                                                                                                                                                                                                                      | Bezahlte Autoren- oder Coautoren-schaft | Forschungs-vorhaben/ Durchführung klinischer Studien                                 | Eigentümer-interessen (Patent, Urheberrecht, Aktienbesitz) | Indirekte Interessen                                                                                                                                                                                                                                                                                                                                                                                                                                                                                                                                                                                                                                                                                                                                                                                                                                                                                                                                                                                                                                                                                                                                                                                                                                                                                                                                   |
|-----------------|----------------------------------------------|---------------------------------------------------------------|--------------------------------------------------------------------------------------------------------------------------------------------------------------------------------------------------------------------------------------------------------------------------------------------------------------------------------------------------------------------------------------------------|-----------------------------------------|--------------------------------------------------------------------------------------|------------------------------------------------------------|--------------------------------------------------------------------------------------------------------------------------------------------------------------------------------------------------------------------------------------------------------------------------------------------------------------------------------------------------------------------------------------------------------------------------------------------------------------------------------------------------------------------------------------------------------------------------------------------------------------------------------------------------------------------------------------------------------------------------------------------------------------------------------------------------------------------------------------------------------------------------------------------------------------------------------------------------------------------------------------------------------------------------------------------------------------------------------------------------------------------------------------------------------------------------------------------------------------------------------------------------------------------------------------------------------------------------------------------------------|
| Däbritz, Jan    | AbbVie<br>Sozialgericht<br>Leipzig<br>AbbVie | Shire                                                         | AbbVie<br>AbbVie<br>AbbVie<br>AbbVie<br>AbbVie<br>AbbVie<br>AbbVie<br>AbbVie<br>Charité© Universi-tätsmedizin Berlin<br>Ferring<br>AbbVie<br>AbbVie<br>Shire<br>AbbVie<br>Klinikum Ernst von Bergmann Potsdam<br>AbbVie<br>Kompetenznetz<br>Darmkrankungen<br>AbbVie<br>Ferring<br>Gesellschaft für Pädiatrische Gastro-entérologie und Ernährung e. V.<br>AbbVie<br>AbbVie<br>AbbVie<br>Ferring | AbbVie                                  | -                                                                                    | -                                                          | Mitglied: Gesellschaft für Pädiatrische Gastro-entérologie und Ernährung (GPGE)<br>Mitglied: Deutsche Gesellschaft für Kinder- und Jugendmedizin (DGJK)<br>Mitglied: Crohn-Colitis-Netz Mecklenburg-Vorpommern<br>Mitglied: Kompetenznetz Darmkrankungen<br>Mitglied: Deutscher Hochschulverband (DHV)<br>Schwerpunkt: Klinische Forschung; chronisch entzündliche Darmkrankungen (insb. Morbus Crohn); Biomarker der intestinalen Entzündung; Ernährung; Arzneimittel für neuartige Therapien (ATMP); klinische Studien (ITIs und Industrie-initi-erte Studien); Versorgungsforschung (Transitions-medin)<br>Schwerpunkt: Translationale Forschung: mukosale Immunität; angeborene Immunantwort; Epigene-tik; Mikrobiom; Immunmodulation; experimentelle Modelle der intestinalen Entzündung<br>Federführung: Heiner-Brunner-Seminar der Gesell-schaft für Pädiatrische Gastroenterologie und Ernährung (GPGE)<br>Federführung: Jahrestagung der Gesellschaft für Pädiatrische Gastroenterologie und Ernährung (GPGE) 2020<br>Federführung: Jahrestagung der Norddeutschen Gesellschaft für Kinder und Jugendmedizin (NDGK)<br>Federführung: Internationales Symposiums & Work-shop on Inborn Errors of Metabolism, Rostock<br>Federführung: CED-Kurs der Gesellschaft für Pädia-trische Gastroenterologie und Ernährung (GPGE)<br>Persönlich: Keine. |
| Ehehalt, Robert | nur im Rahmen eines advisory boards (s. u.)  | MSD, Sandoz, Janssen, Ferring, Takeda, Pfizer, Biogen, Amgen  | Falk, Janssen, AbbVie, MSD, Ferring, Norgine, Takeda, Shield, Mundiphar-ma, Pfizer, Viofor, Ardeypharm, Hexal, Microbiotika, Biogen, Celgene, Rekordati, Diasorin                                                                                                                                                                                                                                | Schattauer Elsevier<br>Degruyter        | IQVIA, Quintilles, FGK, Anomed, Celgene, MedPharmTec, Falk, AbbVie, Janssen, Parexel | Boardmitglied bei Defensins thera-peutics                  | Mitglied: DGVS, DCCV, SWDGG, DDC, BNC, Kompetenznetz Darmkrankungen, ECCO, AGA<br>Schwerpunkt: klinische Forschung (Medikamen-tenstudien Phase II-IV)<br>Federführung: nicht federführend<br>Persönlich: keine                                                                                                                                                                                                                                                                                                                                                                                                                                                                                                                                                                                                                                                                                                                                                                                                                                                                                                                                                                                                                                                                                                                                         |

|                        | Berater-/Gutachter-tätigkeit | Mitarbeit in einem wissenschaftlichen Beirat (advisory board) | Bezahlte Vortrags- oder Schulungs-tätigkeit                                   | Bezahlte Autoren- oder Coautoren-schaft | Forschungs-vorhaben/ Durchführung klinischer Studien | Eigentümer-interessen (Patent, Urheberrecht, Aktienbesitz) | Indirekte Interessen                                                                                                                                                                    |
|------------------------|------------------------------|---------------------------------------------------------------|-------------------------------------------------------------------------------|-----------------------------------------|------------------------------------------------------|------------------------------------------------------------|-----------------------------------------------------------------------------------------------------------------------------------------------------------------------------------------|
| Esters, Philip         | Tillotts                     | Janssen Cilag                                                 | Vifor<br>Vifor                                                                | -                                       | -                                                    | -                                                          | Mitglied: -<br>Schwerpunkt: -<br>Federführung: -<br>Persönlich: -                                                                                                                       |
| Fellermann, Klaus      | Falkpharma                   | -                                                             | Falkpharma, MSD, AbbVie, Janssen, Takeda                                      | -                                       | div. Phase III                                       | Aktien (Astellas)                                          | Mitglied: -<br>Schwerpunkt: Grundlagenforschung, klinische Versorgungsforschung CED<br>Federführung: regionale und überregionale Veranstaltungen, z. B. CED kontrovers<br>Persönlich: - |
| Fichtner-Feigl, Stefan | -                            | -                                                             | -                                                                             | -                                       | -                                                    | -                                                          | Mitglied: DGAV<br>Schwerpunkt: intestinale und onkologische Immunologie<br>Federführung: Universitätsklinikum Freiburg<br>Persönlich: nein                                              |
| Gross, Cordula         | entfällt                     | entfällt                                                      | entfällt                                                                      | entfällt                                | entfällt                                             | entfällt                                                   | Mitglied: DCCV e. V.<br>Schwerpunkt: -<br>Federführung: -<br>Persönlich: -                                                                                                              |
| Götz, Martin           | AbbVie                       | Takeda                                                        | Falk                                                                          | -                                       | -                                                    | -                                                          | Mitglied: -<br>Schwerpunkt: -<br>Federführung: -<br>Persönlich: -                                                                                                                       |
| Hartmann, Franz        | Falk Foundation              | AbbVie, Takeda                                                | AbbVie, Takeda, Janssen, Falk                                                 | -                                       | -                                                    | -                                                          | Mitglied: BVGD Vorsitzender Gastrologia Vorstand<br>Schwerpunkt: klin. Studien Übersichtsartikel<br>Federführung: -<br>Persönlich: -                                                    |
| Hartmann, Petra        | Pfizer                       | Janssen                                                       | Kompetenznetz<br>Darmerkrankungen<br>AbbVie, Janssen, Takeda, Tillotts, Amgen | ECCO                                    | keine                                                | keine                                                      | Mitglied: keine<br>Schwerpunkt: keine<br>Federführung: Versorgungsassistenz CED<br>Persönlich: keine                                                                                    |
| Helwig, Ulf            | -                            | MSD<br>Amgen<br>Biogen<br>Takeda<br>Janssen                   | Kompetenznetz<br>MSD<br>AbbVie<br>Takeda<br>Janssen                           | -                                       | Robarts<br>Shield<br>Kompetenznetz<br>AbbVie         | -                                                          | Mitglied: DGVS<br>Mitglied: DGIM<br>Mitglied: BNG<br>Mitglied: Kompetenznetz Darmkankungen<br>Mitglied: GfSG                                                                            |

|                   | Berater-/Gutachter-tätigkeit              | Mitarbeit in einem Wissenschaftlichen Beirat (advisory board)      | Bezahlte Vortrags- oder Schulungs-tätigkeit                                                              | Bezahlte Autoren- oder Coautoren-schaft                            | Forschungs-vorhaben/ Durchführung klinischer Studien | Eigentümer-interessen (Patent, Urheberrecht, Aktienbesitz) | Indirekte Interessen                                                                                                                                                                                                                                                                                                                                                                                                             |
|-------------------|-------------------------------------------|--------------------------------------------------------------------|----------------------------------------------------------------------------------------------------------|--------------------------------------------------------------------|------------------------------------------------------|------------------------------------------------------------|----------------------------------------------------------------------------------------------------------------------------------------------------------------------------------------------------------------------------------------------------------------------------------------------------------------------------------------------------------------------------------------------------------------------------------|
|                   |                                           |                                                                    | Pfizer<br>Cefis<br>Norgine<br>Shield<br>Biogen<br>-                                                      |                                                                    |                                                      |                                                            | Mitglied: IBUS<br>Mitglied: BDI<br>Mitglied: NDGG<br>Mitglied: BNFI<br>Schwerpunkt: Sonografie bei CED<br>Schwerpunkt: Therapiemonitoring bei CED<br>Schwerpunkt: Diagnostik bei CED<br>Federführung: Vorlesung Universität Kiel<br>Federführung: Vorlesung Universität Oldenburg<br>Federführung: Studentenkurs Universität Kiel<br>Federführung: Fortbildungsveranstaltung<br>CED regional<br>Federführung: -<br>Persönlich: - |
| Herrlinger, Klaus | Schlichtungsstelle für Arzthaftungsfragen | -                                                                  | Falk Foundation                                                                                          | -                                                                  | Asklepios ProResearch                                | -                                                          | Mitglied: DGVS, DGIM, DGI, DDG, NDDG<br>Schwerpunkt: CED, Immunsuppression, Pharmakogenetik<br>Federführung: CED kontrovers Heidelberg Gastro Seminar, Heidelberger Hausärzteseminar<br>Persönlich: -                                                                                                                                                                                                                            |
| Hoffmann, Jörg C. | -                                         | Amgen<br>Astra<br>Sandoz/Hexal<br>Janssen<br>Pfizer<br>Steigerwald | Takeda<br>Kompetenznetz<br>CED<br>Janssen<br>Falk                                                        | Takeda                                                             | AbbVie<br>Pfizer<br>Takeda<br>Janssen                | -                                                          | Mitglied: DCCV<br>Schwerpunkt: Übersetzung Harrison's Internal Medicine<br>Schwerpunkt: Herausgeber CED Manual 3. Auflage, früher Thieme, jetzt Springer<br>Federführung: -<br>Persönlich: -                                                                                                                                                                                                                                     |
| Häuser, Winfried  | IQWiG                                     | nein                                                               | Knappschaftskrankenhaus Püttlingen<br>Biovents (Kongressorganisation)<br>Biovents (Kongressorganisation) | Institut de la Conference<br>Hippocrate (Servier)<br>Ecomed Verlag | keine                                                | keine                                                      | Mitglied: Beirat der Deutschen Schmerzgesellschaft<br>Mitglied: -<br>Mitglied: Mitglied der Deutschen Gesellschaft für Psychosomatische Medizin und Psychotherapie<br>Mitglied: Mitherausgeber der Pain Palliative and Supportive Care Group der Cochrane Collaboration<br>Schwerpunkt: Versorgungsforschung: Systematische Übersichtsarbeiten; Patienten-Surveys<br>Federführung: nein<br>Persönlich: nein                      |

|                         | Berater-/Gutachter-tätigkeit                                               | Mitarbeit in einem Wissenschaftlichen Beirat (advisory board) | Bezahlte Vortrags- oder Schulungs-tätigkeit                                              | Bezahlte Autoren- oder Coautoren-schaft                       | Forschungs-vorhaben/ Durchführung klinischer Studien | Eigentümer-interessen (Patent, Urheberrecht, Aktienbesitz) | Indirekte Interessen                                                                                                                                                                                                                                                                                                                                                                                                                                                                                                                                                                                                                                                                                                                                                                                             |
|-------------------------|----------------------------------------------------------------------------|---------------------------------------------------------------|------------------------------------------------------------------------------------------|---------------------------------------------------------------|------------------------------------------------------|------------------------------------------------------------|------------------------------------------------------------------------------------------------------------------------------------------------------------------------------------------------------------------------------------------------------------------------------------------------------------------------------------------------------------------------------------------------------------------------------------------------------------------------------------------------------------------------------------------------------------------------------------------------------------------------------------------------------------------------------------------------------------------------------------------------------------------------------------------------------------------|
| In der Smitten, Susanne | -                                                                          | -                                                             | -                                                                                        | -                                                             | -                                                    | -                                                          | Mitglied: Mitglied in einer Patientenorganisation: DCCV e. V. Inselstraße 1, 10179 Berlin<br>Schwerpunkt: Forschung über Hochschulen<br>Federführung: -<br>Persönlich: -                                                                                                                                                                                                                                                                                                                                                                                                                                                                                                                                                                                                                                         |
| Kaltz, Birgit           | -                                                                          | -                                                             | DGVS                                                                                     | -                                                             | -                                                    | -                                                          | Mitglied: Kompetenznetz Darmerkrankungen<br>Mitglied: DCCV e. V.<br>Schwerpunkt: -<br>Federführung: -<br>Persönlich: -                                                                                                                                                                                                                                                                                                                                                                                                                                                                                                                                                                                                                                                                                           |
| Kanbach, Inken          | -                                                                          | -                                                             | -                                                                                        | -                                                             | -                                                    | -                                                          | Mitglied: -<br>Schwerpunkt: -<br>Federführung: -<br>Persönlich: -                                                                                                                                                                                                                                                                                                                                                                                                                                                                                                                                                                                                                                                                                                                                                |
| Kannengießer, Klaus     | -                                                                          | -                                                             | AbbVie<br>Janssen Cilag<br>CED Service GmbH                                              | AbbVie                                                        | -                                                    | -                                                          | Mitglied: Mitgliedschaft: Bund deutscher Internisten, ECCO (Europäische Crohn- und Colitis Organisation), NDGG jeweils ohne leitende Funktion<br>Schwerpunkt: Chronisch entzündliche Darmerkrankungen, Endoskopie<br>Federführung: nein<br>Persönlich: nein                                                                                                                                                                                                                                                                                                                                                                                                                                                                                                                                                      |
| Keller, Klaus-Michael   | Schlichtungsstelle für Arzthaftpflichtfragen der Ärztekammer Niedersachsen | nein                                                          | Schulungsvorträge für das CED-Assistenzpersonal im Rahmen Kompetenznetz Darmerkrankungen | Springer-Verlag Stuttgart, Urban-Schwarzenberg, Thieme-Verlag | nein                                                 | nein                                                       | Mitglied: Mitglied in wiss. Gesellschaften wie: European Society for Pediatric Gastroenterology, Hepatology and Nutrition (ESPGHAN); Gesellschaft für Pädiatrische Gastroenterologie (GPGE, Gründungsmitglied); Deutsche Gesellschaft für Kinderheilkunde und Jugendmedizin (DGKJ), Berufsverband der Kinder- und Jugendärzte (BVKJ), DCCV, DZG, Dt. Mukoviszidose eV, M. Wilson eV<br>Schwerpunkt: alle Themen der pädiatrischen Gastroenterologie, vor allem CED, Zöliakie, Nahrungsmittelallergie, Malnutrition, M. Wilson.<br>Multiple Lehrbuch- und Fortbildungsartikel dazu<br>Mitglied in der CEDATA-GPGE und daraus entstandene Studien sowie Fachartikel<br>Federführung: Vorsitzender des Fortbildungsausschusses des Berufsverbandes der Kinder – und Jugendärzte (BVKJ); Organisation der jährlichen |



|                   | Berater-/Gutachter-tätigkeit | Mitarbeit in einem Wissenschaftlichen Beirat (advisory board) | Bezahlte Vortrags- oder Schulungs-tätigkeit                            | Bezahlte Autoren- oder Coautoren-schaft | Forschungs-vorhaben/ Durchführung klinischer Studien | Eigentümer-interessen (Patent, Urheberrecht, Aktienbesitz) | Indirekte Interessen                                                                                                                                                                                                                                                                                                                                                  |
|-------------------|------------------------------|---------------------------------------------------------------|------------------------------------------------------------------------|-----------------------------------------|------------------------------------------------------|------------------------------------------------------------|-----------------------------------------------------------------------------------------------------------------------------------------------------------------------------------------------------------------------------------------------------------------------------------------------------------------------------------------------------------------------|
| Kienle, Peter     | -                            | -                                                             | -                                                                      | -                                       | -                                                    | -                                                          | Überregionalen Kongresse des BVKJ wie den Kinder- und Jugendärztetag in Berlin im Juni sowie des Herstseminarkongresses in Bad Orb im Oktober<br>Persönlich: keine<br>Mitglied: -<br>Schwerpunkt: -<br>Federführung: -<br>Persönlich: -                                                                                                                               |
| Klaus, Jochen     | AbbVie                       | Falk                                                          | Takeda                                                                 | Janssen                                 | Pfizer                                               | Pharmacosmos                                               | Mitglied: -<br>Schwerpunkt: -<br>Federführung: -<br>Persönlich: -                                                                                                                                                                                                                                                                                                     |
| Koletzko, Sibylle | -                            | -                                                             | -                                                                      | -                                       | -                                                    | -                                                          | Mitglied: -<br>Schwerpunkt: -<br>Federführung: -<br>Persönlich: -                                                                                                                                                                                                                                                                                                     |
| Kreis, Martin     | Fa. Coloplast                | Takeda                                                        | Coloplast<br>Falk Foundation<br>Johnson & Johnson<br>Janssen<br>Takeda | keine                                   | Takeda                                               | keine                                                      | Mitglied: Vorsitzender Deutsche Gesellschaft für Koloproktologie<br>Mitglied: Vorsitzender Berliner Chirurgische Gesellschaft<br>Mitglied: 2. Vorsitzender Berliner Krebsgesellschaft<br>Schwerpunkt: postoperativer Ileus chronisch entzündliche Darmerkrankungen Chirurgische, Onkologie postoperative Funktionsstörungen<br>Federführung: nein<br>Persönlich: nein |
| Kroesen, Anton-J. | -                            | -                                                             | Falk<br>AbbVie                                                         | -                                       | -                                                    | -                                                          | Mitglied: DGAV, DGVS, DGCH<br>Schwerpunkt: Veranstaltung von Fortbildungen fachlicher Natur ohne Produktbezug<br>Federführung: -<br>Persönlich: -                                                                                                                                                                                                                     |
| Kruis, Wolfgang   | -                            | Tillots                                                       | Ardeypharm                                                             | -                                       | Dr. Falkpharma                                       | keine                                                      | Mitglied: DGVS<br>Schwerpunkt: Chronisch entzündliche Darm-erkrankungen Reizdarm Mikrobiom/Probiotika Divertikelkrankheit<br>Federführung: DGVS<br>Persönlich: keine                                                                                                                                                                                                  |

|                    | Berater-/Gutachter-tätigkeit          | Mitarbeit in einem Wissenschaftlichen Beirat (advisory board)                         | Bezahlte Vortrags- oder Schulungs-tätigkeit                                                  | Bezahlte Autoren- oder Coautoren-schaft                                                                                                                                                                                                                                        | Forschungs-vorhaben/ Durchführung klinischer Studien | Eigentümer-interessen (Patent, Urheberrecht, Aktienbesitz) | Indirekte Interessen                                                                                                                                                                                                                                                                                                                                                                                                                                                                                                                                                                                                                                                                                                                                                                                         |
|--------------------|---------------------------------------|---------------------------------------------------------------------------------------|----------------------------------------------------------------------------------------------|--------------------------------------------------------------------------------------------------------------------------------------------------------------------------------------------------------------------------------------------------------------------------------|------------------------------------------------------|------------------------------------------------------------|--------------------------------------------------------------------------------------------------------------------------------------------------------------------------------------------------------------------------------------------------------------------------------------------------------------------------------------------------------------------------------------------------------------------------------------------------------------------------------------------------------------------------------------------------------------------------------------------------------------------------------------------------------------------------------------------------------------------------------------------------------------------------------------------------------------|
| Kucharzik, Torsten | Janssen<br>Gilead<br>AbbVie<br>Takeda | Janssen<br>Celltrion<br>Takeda<br>Amgen<br>Biogen<br>Hospira<br>Mundipharma<br>AbbVie | Dr. Falk Pharma<br>AbbVie<br>MSD<br>Takeda<br>Janssen<br>Roche                               | Zahlreiche Publikationen zum Thema CED in peer-reviewed Journalen, die in PubMed unter „Kucharzik“ abrufbar sind. Zahlreiche Buchprojekte zum Thema CED, z. B. eigenes Buchprojekt („Therapie chronisch entzündlicher Darmerkrankungen“ als Miterausgeber im De Gruyter Verlag | Takeda                                               | keine                                                      | Mitglied: NDGG, Vorsitzender seit 2/2018<br>Mitglied: DGVS Beiratsmitglied<br>Mitglied: DGIM<br>Mitglied: BDI<br>Mitglied: IBUS (finanziert u. a. durch AbbVie, Janssen, Takeda). Keine direkten Zuwendungen, diese gehen ausschließlich an den Verein. Mittel werden zur Ausbildung im Darmultraschall bei CED genutzt.<br>Mitglied: Kompetenznetz Darmerkrankungen, Vorstandsmitglied<br>Mitglied: AGA<br>Mitglied: ECCO (Mitglied des GuiCom, ehemals Mitglieder des EduCom)<br>Mitglied: DCCV Beiratsmitglied<br>Schwerpunkt: CED, Bildgebende Diagnostik, Darmsonografie<br>Federführung: DGVS Gastroenterologie Intensivkurs<br>Federführung: Falk Gastroenterologie Symposium Lüneburg<br>Federführung: CED kontrovers in Hamburg und Stuttgart (finanziert durch Dr. Falk GmbH)<br>Persönlich: keine |
| Kühbacher, Tanja   | -                                     | Takeda<br>AbbVie<br>MSD<br>Janssen<br>Arena<br>Mundipharma<br>Tillotts                | Allmiral<br>Takeda<br>Ferring<br>Falk<br>Mundipharma<br>Tillotts<br>MSD<br>AbbVie<br>Janssen | Arena<br>Takeda<br>Galapagos                                                                                                                                                                                                                                                   | -                                                    | -                                                          | Mitglied: DGVS<br>Mitglied: DGIM<br>Mitglied: AGA<br>Mitglied: NDGG<br>Mitglied: Stiftung Darmerkrankungen ehrenamtlicher Vorstand<br>Mitglied: DCCV<br>Mitglied: ALGK<br>Mitglied: VLK<br>Mitglied: ECCO<br>Schwerpunkt: Mikrobiom Biologika Therapien, Signaltransduktion, klinische Studien<br>Federführung: –<br>Persönlich: –                                                                                                                                                                                                                                                                                                                                                                                                                                                                           |

|                     | Berater-/Gutachter-tätigkeit                                                       | Mitarbeit in einem Wissenschaftlichen Beirat (advisory board) | Bezahlte Vortrags- oder Schulungstätigkeit                                                         | Bezahlte Autoren- oder Coautoren-schaft | Forschungs-vorhaben/ Durchführung klinischer Studien                                      | Eigentümer-interessen (Patent, Urheberrecht, Aktienbesitz) | Indirekte Interessen                                                                                                                                                                                                                                                                                                                                                                                                                                                                                                                                                                                                                                                                                                                                                                                                                                                                                                                                         |
|---------------------|------------------------------------------------------------------------------------|---------------------------------------------------------------|----------------------------------------------------------------------------------------------------|-----------------------------------------|-------------------------------------------------------------------------------------------|------------------------------------------------------------|--------------------------------------------------------------------------------------------------------------------------------------------------------------------------------------------------------------------------------------------------------------------------------------------------------------------------------------------------------------------------------------------------------------------------------------------------------------------------------------------------------------------------------------------------------------------------------------------------------------------------------------------------------------------------------------------------------------------------------------------------------------------------------------------------------------------------------------------------------------------------------------------------------------------------------------------------------------|
| Langhorst, Jost     | Medizin Verlag Stuttgart<br>Dr. Willmar Schwabe<br>Repha GmbH<br>Ferring<br>Sanofi | -                                                             | Falk Foundation<br>Arktibiotic<br>Repha GmbH<br>Celgene<br>Dr. Willmar Schwabe<br>AbbVie<br>Takeda | nein                                    | Dr. Willmar Schwabe<br>Falk Foundation<br>Steigerwald Arznei-mittelwerke/Bayer<br>Techlab | nein                                                       | Mitglied: Leitlinienbeauftragter der Gesellschaft für Phytotherapie und der Deutschen Gesellschaft für Naturheilkunde, Sprecher der AG Psychosomatik in der Gastroenterologie der Deutschen Gesellschaft für Gastroenterologie, Deutsche Schmerzgesellschaft, Deutsches Kollegium für Psychosomatische Medizin<br>Schwerpunkt: Mind/Body Medicine/Ordnungstherapie, klassische Naturheilkunde und traditionellen europäischen Heilverfahren ganzheitliche Prävention Phytotherapie, chronisch entzündliche Darm-erkrankungen (CED), Reizdarmsyndrom Fibro-myalgiesyndrom, non-invasive diagnostische Verfahren in der Gastroenterologie<br>Federführung: Zusatzbezeichnung Naturheilkunde an den Kliniken Essen-Mitte EXPERTE IM FACHGEBIET im Bereich KOMPLEMENTÄRMEDIZIN und Psychosomatik für die ZERTIFIZIERUNG CHRONISCH ENTZÜNDLICHE DARMERKRANKUNGEN der DEUTSCHEN GESELLSCHAFT FÜR VERDAUUNG UND STOFFWECHSELERKRANKUNGEN – DGVS<br>Persönlich: nein |
| Leifeld, Ludger     | keine                                                                              | keine                                                         | bezahlte Vortrags-tätigkeit für Falk, Takeda, AbbVie, Fujinon                                      | siehe pubmed                            | Prognos Studie                                                                            | keine                                                      | Mitglied: DGVS, NDGG, BVVG, DGI, DCCV, ALGK, DGIM, Kopetenznetz CED<br>Schwerpunkt: Gastroenterologie<br>Federführung: regelmäßig<br>Persönlich: keine                                                                                                                                                                                                                                                                                                                                                                                                                                                                                                                                                                                                                                                                                                                                                                                                       |
| Lynen Jansen, Petra | k. A.                                                                              | k. A.                                                         | k. A.                                                                                              | k. A.                                   | k. A.                                                                                     | k. A.                                                      | Mitglied: k. A.<br>Schwerpunkt: k. A.<br>Federführung: k. A.<br>Persönlich: k. A.                                                                                                                                                                                                                                                                                                                                                                                                                                                                                                                                                                                                                                                                                                                                                                                                                                                                            |
| Lügering, Andreas   | -                                                                                  | AbbVie<br>Janssen<br>Takeda<br>MSD                            | Janssen<br>AbbVie<br>Falk<br>MSD<br>Takeda                                                         | AbbVie                                  | -                                                                                         | -                                                          | Mitglied: DGVS, ECCO, DGIM, DGMIM, BNG, KN-CED<br>Schwerpunkt: -<br>Federführung: -<br>Persönlich: -                                                                                                                                                                                                                                                                                                                                                                                                                                                                                                                                                                                                                                                                                                                                                                                                                                                         |
| Maaser, Christian   | -                                                                                  | AbbVie<br>Takeda<br>Biogen<br>-                               | AbbVie<br>Takeda<br>-                                                                              | AbbVie                                  | AbbVie                                                                                    | keine                                                      | Mitglied: DCCV/Beirat<br>Mitglied: GISG/Sprechergremium<br>Mitglied: IBUS/Vorsitzender<br>Schwerpunkt: Darmsonografie bei CED<br>Federführung: nein<br>Persönlich: -                                                                                                                                                                                                                                                                                                                                                                                                                                                                                                                                                                                                                                                                                                                                                                                         |

|                       | Berater-/Gutachter-tätigkeit | Mitarbeit in einem Wissenschaftlichen Beirat (advisory board) | Bezahlte Vortrags- oder Schulungs-tätigkeit                                                                                                                                                                                       | Bezahlte Autoren- oder Coautoren-schaft | Forschungs-vorhaben/ Durchführung klinischer Studien | Eigentümer-interessen (Patent, Urheberrecht, Aktienbesitz) | Indirekte Interessen                                                                                                                                                                                                                                                                                                                                                                    |
|-----------------------|------------------------------|---------------------------------------------------------------|-----------------------------------------------------------------------------------------------------------------------------------------------------------------------------------------------------------------------------------|-----------------------------------------|------------------------------------------------------|------------------------------------------------------------|-----------------------------------------------------------------------------------------------------------------------------------------------------------------------------------------------------------------------------------------------------------------------------------------------------------------------------------------------------------------------------------------|
| Matthes, Harald       | -                            | -                                                             | -                                                                                                                                                                                                                                 | -                                       | -                                                    | -                                                          | Mitglied: Beiratsmitglied der DCCV<br>Schwerpunkt: CED, Onkologie, Reizdarm<br>Federführung: DAHN (Dt. Akademie für Naturheil-<br>verfahren und Homöopathie)<br>Persönlich: nein                                                                                                                                                                                                        |
| Moog, Gero            | -                            | -                                                             | -                                                                                                                                                                                                                                 | -                                       | -                                                    | -                                                          | Mitglied: -<br>Schwerpunkt: -<br>Federführung: -<br>Persönlich: -                                                                                                                                                                                                                                                                                                                       |
| Niess, Jan<br>Hendrik | nein                         | AbbVie<br>Takeda<br>Janssen<br>MSD<br>Pfizer                  | nein                                                                                                                                                                                                                              | nein                                    | Vfor                                                 | nein                                                       | Mitglied: Schweizer Gesellschaft für Gastro-<br>enterologie<br>Mitglied: Deutsche Gesellschaft für Gastro-<br>enterologie<br>Mitglied: Kompetenznetz CED<br>Mitglied: IBD Net<br>Mitglied: European Crohn and Colitis<br>Schwerpunkt: zahlreiche Publikationen zu transla-<br>tionalen Aspekten der chronisch entzündlichen<br>Darmkrankungen<br>Federführung: nein<br>Persönlich: nein |
| Ockenga,<br>Johann    | -                            | Fresenius Kabi<br>GmbH                                        | Dr. Karl Schulze,<br>Hannover<br>ifi Institut für<br>Infektiologie &<br>Hepatology<br>Merz<br>Aerzteammer<br>Niedersachsen<br>Falk Foundation e. v.<br>GFO Kliniken<br>Klinikum WHV<br>Uniklinikum Essen<br>Falk Foundation e. v. | -                                       | -                                                    | -                                                          | Mitglied: Präsident der Deutschen Gesellschaft für<br>ernährungsmedizin<br>Mitglied: Task Force Quality of Care, UEG<br>Schwerpunkt: -<br>Federführung: Erstellung Leitlinie Ernährung bei<br>Pankreaserkrankung der Deutschen Gesellschaft für<br>Ernährungsmedizin<br>Persönlich: -                                                                                                   |
| Ott, Claudia          | Takeda<br>Janssen-Cilag      | MSD<br>Janssen-Cilag                                          | Falk Foundation<br>Falk Foundation<br>AbbVie<br>AbbVie<br>AbbVie<br>AbbVie                                                                                                                                                        | -                                       | -                                                    | -                                                          | Mitglied: Gesellschaft für Gastroenterologie in<br>Bayern, Beirätin<br>Mitglied: DCCV, Ärztliche Beirätin<br>Schwerpunkt: Epidemiologie bei CED<br>Federführung: -<br>Persönlich: -                                                                                                                                                                                                     |

|                  | Berater-/Gutachter-tätigkeit | Mitarbeit in einem Wissenschaftlichen Beirat (advisory board)     | Bezahlte Vortrags- oder Schulungstätigkeit                                                                                                            | Bezahlte Autoren- oder Coautoren-schaft | Forschungs-vorhaben/ Durchführung klinischer Studien | Eigentümer-interessen (Patent, Urheberrecht, Aktienbesitz) | Indirekte Interessen                                                                                                                                                           |
|------------------|------------------------------|-------------------------------------------------------------------|-------------------------------------------------------------------------------------------------------------------------------------------------------|-----------------------------------------|------------------------------------------------------|------------------------------------------------------------|--------------------------------------------------------------------------------------------------------------------------------------------------------------------------------|
|                  |                              |                                                                   | AbbVie<br>AbbVie<br>AbbVie<br>AbbVie<br>AbbVie<br>MSD<br>MSD<br>MSD<br>MSD<br>MSD<br>Janssen-Cilag<br>Janssen-Cilag<br>Janssen-Cilag<br>Janssen-Cilag |                                         |                                                      |                                                            |                                                                                                                                                                                |
| Pace, Andrea     | -                            | AbbVie, Janssen, Takeda                                           | AbbVie, Janssen, Takeda, Pfizer, MSD                                                                                                                  | -                                       | -                                                    | -                                                          | Mitglied: -<br>Schwerpunkt: -<br>Federführung: -<br>Persönlich: -                                                                                                              |
| Preiß, Jan       | -                            | Takeda<br>Biogen<br>Amgen                                         | DGVS<br>DCCV<br>bng<br>CED Services                                                                                                                   | -                                       | -                                                    | -                                                          | Mitglied: DGVS, DCCV, BNG, DGIM, ECCO<br>Schwerpunkt: CED<br>Federführung: -<br>Persönlich: -                                                                                  |
| Reinshagen, Max  | -                            | AbbVie, Janssen, Takeda, MSD, Amgen, Recordati, Boehringer        | AbbVie, Janssen, Takeda, MSD, Amgen, Recordati, Boehringer                                                                                            | -                                       | AbbVie Gilead                                        | -                                                          | Mitglied: DGVS, AGA<br>Schwerpunkt: Chronisch entzündliche Darm-erkrankungen<br>Federführung: -<br>Persönlich: -                                                               |
| Rijcken, Emile   | Takeda                       | Takeda                                                            | AbbVie                                                                                                                                                | De Gruyter Verlag                       | -                                                    | -                                                          | Mitglied: -<br>Schwerpunkt: -<br>Federführung: -<br>Persönlich: -                                                                                                              |
| Schmidt, Carsten | -                            | AbbVie<br>Biogen<br>Hospira<br>Janssen-Cilag<br>Takeda<br>Janssen | Berlin Chemie<br>Falk<br>Janssen<br>Kompetenznetz<br>Darmkrankungen<br>MSD                                                                            | AbbVie<br>Takeda                        | AbbVie<br>AbbVie                                     | -                                                          | Mitglied: DGVS, Mitglied<br>Mitglied: ECCO, Mitglied<br>Mitglied: Kompetenznetz Darmkrankungen,<br>Mitglied<br>Mitglied: CIGS (German IBD Study Group),<br>Mitglied des Boards |

|                   | Berater-/Gutachter-tätigkeit  | Mitarbeit in einem Wissenschaftlichen Beirat (advisory board)                              | Bezahlte Vortrags- oder Schulungs-tätigkeit                                                                                                                                                                             | Bezahlte Autoren- oder Coautoren-schaft | Forschungs-vorhaben/ Durchführung klinischer Studien                                                                                                                                                                     | Eigentümer-interessen (Patent, Urheberrecht, Aktienbesitz) | Indirekte Interessen                                                                                                                                                                                                                      |
|-------------------|-------------------------------|--------------------------------------------------------------------------------------------|-------------------------------------------------------------------------------------------------------------------------------------------------------------------------------------------------------------------------|-----------------------------------------|--------------------------------------------------------------------------------------------------------------------------------------------------------------------------------------------------------------------------|------------------------------------------------------------|-------------------------------------------------------------------------------------------------------------------------------------------------------------------------------------------------------------------------------------------|
|                   |                               | Takeda<br>AbbVie                                                                           | Norgine<br>Shield Therapeutics<br>Takeda<br>AbbVie<br>Falk<br>Takeda<br>MSD<br>Janssen<br>Biogen<br>Amgen<br>Vifor<br>Norgine                                                                                           |                                         |                                                                                                                                                                                                                          |                                                            | Mitglied: Mitteldeutsche Gesellschaft für Gastroen-terologie, Mitglied des Wissenschaftlichen Beirates<br>Mitglied: DGIM<br>Federführung: Arzt-Patienten-Seminare<br>Federführung: Fortbildungsveranstaltungen für Ärzte<br>Persönlich: – |
| Schnoy, Elisabeth | Janssen-Cilag<br>Pharmacosmos | Takeda                                                                                     | AbbVie                                                                                                                                                                                                                  | Servier                                 | –                                                                                                                                                                                                                        | nein                                                       | Mitglied: DGVS, DGIM<br>Schwerpunkt: Grundlagenforschung CED<br>Federführung: Aufbau Universitätsklinikum Augsburg<br>Persönlich: nein                                                                                                    |
| Schreyer, Andreas | –                             | Takeda                                                                                     | Bayer                                                                                                                                                                                                                   | –                                       | –                                                                                                                                                                                                                        | Aktienbesitz<br>Siemens<br>Healthineers                    | Mitglied: –<br>Schwerpunkt: –<br>Federführung: –<br>Persönlich: –                                                                                                                                                                         |
| Siegmund, Britta  | –                             | AbbVie<br>AbbVie<br>Lilly<br>Pfizer<br>Celgene<br>Janssen<br>Prometheus<br>Takeda<br>webMD | AbbVie<br>Berlin Flame<br>Boceemium<br>CED Service GmbH<br>Falk Foundation<br>Ferring<br>Forma Software<br>Infektionsmedizin<br>Janssen<br>Klinikum Augsburg<br>Uni Düsseldorf<br>Novartis<br>Pfizer<br>Roche<br>Takeda | Falk                                    | AbbVie<br>Abivax<br>CED Service GmbH<br>Celgene<br>CromSource<br>Falk<br>Lilly<br>Hoffmann – La Roche<br>InDex Pharmaceuti-<br>cals AB<br>Janssen<br>Medimmune Ltd<br>Pfizer<br>Receptos<br>Salix<br>Takeda<br>Vhsquared | keine                                                      | Mitglied: DGVS Vorstand<br>Mitglied: DCCV<br>Mitglied: UEG<br>Mitglied: DGIM<br>Mitglied: ECCO<br>Schwerpunkt: mukosale Immunologie, CED<br>Federführung: keine<br>Persönlich: keine                                                      |

| Berater-/Gutachter-tätigkeit | Mitarbeit in einem Wissenschaftlichen Beirat (advisory board)      | Bezahlte Vortrags- oder Schulungstätigkeit                                                                                                                                     | Bezahlte Autoren- oder Coautoren-schaft        | Forschungs-vorhaben/ Durchführung klinischer Studien      | Eigentümer-interessen (Patent, Urheberrecht, Aktienbesitz) | Indirekte Interessen                                                                                                                                                                                                                                                                                                                                                                                     |
|------------------------------|--------------------------------------------------------------------|--------------------------------------------------------------------------------------------------------------------------------------------------------------------------------|------------------------------------------------|-----------------------------------------------------------|------------------------------------------------------------|----------------------------------------------------------------------------------------------------------------------------------------------------------------------------------------------------------------------------------------------------------------------------------------------------------------------------------------------------------------------------------------------------------|
| Stallmach, Andreas           | MSD<br>Takeda<br>AMGEN<br>Abbvie<br>Janssen<br>Celltrion<br>Pfizer | Falk Foundation<br>AbbVie<br>Janssen<br>CLCSL Behring<br>GmbH<br>MSD sharp<br>Med update<br>DGVS<br>Takeda Pharma<br>Vertrieb<br>Pfizer Pharma<br>GmbH<br>streamupdate<br>GmbH | Elsevier<br>Thieme Verlag<br>Walter de Gruyter | -                                                         | -                                                          | Mitglied: IMPP und FKLM<br>Mitglied: DGVS<br>Mitglied: Deutsche Gesellschaft für Innere Medizin e. V.<br>Mitglied: Mitteldeutsche Gesellschaft für Gastro-entnologie e. V.<br>Mitglied: Bundesverband Gastroenterologie Deutschland<br>Mitglied: DCCV<br>Mitglied: Verein Kompetenznetz chronische Darmerkrankungen e. V.<br>Mitglied: Gastro-Liga<br>Schwerpunkt: –<br>Federführung: –<br>Persönlich: – |
| Stange, Eduard F.            | Amgen                                                              | Falk, Ferring,<br>Janssen, Takeda                                                                                                                                              | -                                              | -                                                         | -                                                          | Mitglied: –<br>Schwerpunkt: –<br>Federführung: –<br>Persönlich: –                                                                                                                                                                                                                                                                                                                                        |
| Stein, Jürgen                | Vifor, Pharma-cosmos, TAKEDA, MSD, Ferring                         | Vifor, Pharma-cosmos, TAKEDA, MSD, FALK, Ferring, Janssen                                                                                                                      | -                                              | Vifor, harmacosmos, TAKEDA, Celgene, Boehringer Ingelheim | -                                                          | Mitglied: –<br>Schwerpunkt: Management der Anämie bei CED<br>Therapiesteuerung bei CED Biomarker bei CED<br>Federführung: Fachkunde Ernährungsmedizin der LÄK CED – was ist klinisch relevant CED interaktiv<br>Persönlich: –                                                                                                                                                                            |
| Sturm, Andreas               | AbbVie<br>Janssen<br>Takeda<br>MSD                                 | -                                                                                                                                                                              | -                                              | -                                                         | -                                                          | Mitglied: UEG, DGVS, ECCO<br>Schwerpunkt: –<br>Federführung: –<br>Persönlich: –                                                                                                                                                                                                                                                                                                                          |
| Teich, Niels                 | MSD, AbbVie, Takeda, Celgene, Janssen, Pfizer, Biogen, Amgen       | CED Service GmbH, MSD, AbbVie, Takeda, Celgene, Janssen, Pfizer, Biogen, Amgen                                                                                                 | Thieme, Springer                               | Pfizer, AbbVie, Gilead Celgene, Receptos                  | -                                                          | Mitglied: DGVS, DCCV, ALGK, ECCO, Bundesverband Gastroenterologie Deutschland, Verein Kompetenz-netz chronische Darmerkrankungen e. V.<br>Schwerpunkt: mukosale Immunologie, CED<br>Federführung: keine<br>Persönlich: keine                                                                                                                                                                             |

|                   | Berater-/Gutachter-tätigkeit | Mitarbeit in einem Wissenschaftlichen Beirat (advisory board) | Bezahlte Vortrags- oder Schulungs-tätigkeit                                                                                                                                                       | Bezahlte Autoren- oder Coautoren-schaft | Forschungs-vorhaben/ Durchführung klinischer Studien                                                                                                   | Eigentümer-interessen (Patent, Urheberrecht, Aktienbesitz) | Indirekte Interessen                                                                                                                                                                                   |
|-------------------|------------------------------|---------------------------------------------------------------|---------------------------------------------------------------------------------------------------------------------------------------------------------------------------------------------------|-----------------------------------------|--------------------------------------------------------------------------------------------------------------------------------------------------------|------------------------------------------------------------|--------------------------------------------------------------------------------------------------------------------------------------------------------------------------------------------------------|
| Thomann, Anne     | -                            | -                                                             | CED Service GmbH<br>CED Service GmbH<br>CED Service GmbH                                                                                                                                          | -                                       | -                                                                                                                                                      | -                                                          | Mitglied: –<br>Schwerpunkt: Darm-Hirn-Achse bei Chronisch-entzündlichen Darmerkrankungen.<br>Publikationen (PMIDs): 30.983.094, 29.734.447, 28.912.568, 27.655.165<br>Federführung: –<br>Persönlich: – |
| Treese, Christoph | -                            | -                                                             | -                                                                                                                                                                                                 | -                                       | Astellars                                                                                                                                              | -                                                          | Mitglied: DGVS/Gastroenterologie<br>Mitglied: DGIM/Innere Medizin<br>Schwerpunkt: Onkologie, Magenkarzinom<br>Federführung: –<br>Persönlich: –                                                         |
| Veltkamp, Claudia | -                            | -                                                             | -                                                                                                                                                                                                 | -                                       | -                                                                                                                                                      | -                                                          | Mitglied: –<br>Schwerpunkt: –<br>Federführung: –<br>Persönlich: –                                                                                                                                      |
| Waldorf, Jens     | -                            | AbbVie<br>Takeda                                              | AbbVie<br>CED Service/<br>Kompetenznetz<br>CED<br>Falk<br>MSD<br>Pfizer<br>Takeda<br>AbbVie<br>Janssen<br>Takeda<br>Vifor<br>MSD<br>Pfizer<br>Amgen<br>Norgine<br>Shire<br>Falk<br>Shield<br>DCCV | -                                       | CED Service<br>Millenium<br>Pharmaceuticals<br>MAPI<br>Hoffmann-La Roche<br>Celgene<br>IQVIA<br>Pfizer<br>Essex Pharma<br>Falk Pharma<br>MSD<br>AbbVie | -                                                          | Mitglied: DCCV (Fördermitglied)<br>Mitglied: DGVS<br>Mitglied: DGIM<br>Schwerpunkt: Familienplanung, Versorgungs-qualität bei CED<br>Federführung: –<br>Persönlich: –                                  |



|                   | Berater-/Gutachter-tätigkeit | Mitarbeit in einem Wissenschaftlichen Beirat (advisory board)                      | Bezahlte Vortrags- oder Schulungstätigkeit                                                                            | Bezahlte Autoren- oder Coautoren-schaft | Forschungs-vorhaben/ Durchführung klinischer Studien | Eigentümer-interessen (Patent, Urheberrecht, Aktienbesitz) | Indirekte Interessen                                                                                                                                                                                                                                                                                                                                                                                                    |
|-------------------|------------------------------|------------------------------------------------------------------------------------|-----------------------------------------------------------------------------------------------------------------------|-----------------------------------------|------------------------------------------------------|------------------------------------------------------------|-------------------------------------------------------------------------------------------------------------------------------------------------------------------------------------------------------------------------------------------------------------------------------------------------------------------------------------------------------------------------------------------------------------------------|
| Zeißig, Sebastian | Celltrion                    | Amgen, Biogen, Bristol-Myers Squibb, Ferring, Mylan, Janssen-Cilag, Pfizer, Takeda | AbbVie, Amgen, Biogen, Falk, Ferring, Janssen-Cilag, MSD, Roche, Pfizer, Pharma Zentrale, Takeda                      | -                                       | -                                                    | -                                                          | Mitglied: Deutsche Gesellschaft für Gastroenterologie, Verdauungs- und Stoffwechselerkrankheiten (DGVS), Deutsche Gesellschaft für Innere Medizin (DGIM), Kompetenznetz Darmerkrankungen Bundesverband Gastroenterologie Deutschland (BVGD), European Crohn's and Colitis Organisation (ECCO), Deutsche Gesellschaft für Immunologie (DGfI)<br>Schwerpunkt: Intestinale Immunologie<br>Federführung: -<br>Persönlich: - |
| Zemke, Jennifer   | -                            | -                                                                                  | MSD<br>Kompetenznetz<br>Darmerkrankung<br>Mundipharma<br>Pfizer<br>Takeda<br>AbbVie<br>Ärztekammer<br>Westfalen Lippe | -                                       | -                                                    | -                                                          | Mitglied: 2. Vorsitzende der FA-CED<br>Schwerpunkt: -<br>Federführung: -<br>Persönlich: -                                                                                                                                                                                                                                                                                                                               |
| de Laffolie, Jan  | -                            | AbbVie<br>pIBDahead<br>Shire<br>pharmacocosmos                                     | Shire                                                                                                                 | keine                                   | GPGE CEDATA GPGE<br>GBA Innovationsfond              | keine                                                      | Mitglied: GPGE – AG Leiter CED GPGE – AG Mitglied<br>gesellschaft chronisches Darmsyndrom GPGE – AG<br>Mitgliedschaft Endoskopie ESPGHAN Mitglied<br>Schwerpunkt: CED, Epidemiologie, Zöliakie,<br>Kurzdarm<br>Federführung: keine<br>Persönlich: keine                                                                                                                                                                 |
